# Supplementary material for: Molecular dynamics calculation of molecular volumes and volumes of activation
Source: Royal Society of Chemistry journal article supplement (doi:10.1039/c2cp22949h), 2012-01-01

Supplementary Information for:

**Molecular Dynamics Calculations of Molecular Volumes and Volumes of  
Activation.**

J. Spooner<sup>2</sup>, H. Wiebe<sup>1,2</sup>, N. Boon<sup>1</sup>, E. Deglint<sup>1</sup>, E. Edwards<sup>1</sup>, B. Yanciw<sup>1</sup>, B. Patton<sup>1</sup>,  
L. Thiele<sup>1</sup>, P. Dance<sup>1</sup>, N. Weinberg\*<sup>1,2</sup>

<sup>1</sup> *Department of Chemistry, University of the Fraser Valley, Abbotsford, BC V2S 7M8, Canada.*

<sup>2</sup> *Department of Chemistry, Simon Fraser University, Burnaby, BC V5S 1A6, Canada.*

**I. OPLS parameters used for missing diene torsions in reactants and solvents.**

| Dihedral Type                                                                       |                                                                                     | OPLS Parameters |                |                |                |                |                |
|-------------------------------------------------------------------------------------|-------------------------------------------------------------------------------------|-----------------|----------------|----------------|----------------|----------------|----------------|
| in diene                                                                            | in OPLS                                                                             | C <sub>0</sub>  | C <sub>1</sub> | C <sub>2</sub> | C <sub>3</sub> | C <sub>4</sub> | C <sub>5</sub> |
| 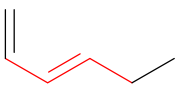   |    | 58.576          | 0.000          | -58.576        | 0.000          | 0.000          | 0.000          |
|    |    | 58.576          | 0.000          | -58.576        | 0.000          | 0.000          | 0.000          |
|    |    | 0.6276          | 1.8828         | 0.000          | -2.5104        | 0.000          | 0.000          |
|   |   | -0.77822        | -2.33467       | 0.000          | 3.11290        | 0.000          | 0.000          |
|  |  | 0.52719         | -6.39734       | -1.69452       | 7.56467        | 0.000          | 0.000          |
|  |  | -0.77822        | -2.33467       | 0.000          | 3.11290        | 0.000          | 0.000          |
|  |  | 0.76567         | 2.29701        | 0.000          | -3.06269       | 0.000          | 0.000          |

## II. Optimized geometries of TS's for reactions (6)-(8)

### Reaction (6): Cyclopentadiene dimerization (B3LYP/6-31++G)

|   |             |             |             |
|---|-------------|-------------|-------------|
| C | -0.00927800 | 0.03123800  | 0.00259700  |
| H | -0.00585000 | 0.00910500  | 1.08419000  |
| C | 1.14194000  | 0.01317400  | -0.83775500 |
| H | 2.10973000  | 0.34692800  | -0.47014400 |
| C | 0.66285300  | 0.44882200  | -2.22953500 |
| H | 0.80303600  | 1.54051000  | -2.32488400 |
| H | 1.19143100  | -0.01931300 | -3.06462500 |
| C | -0.81366800 | 0.13105900  | -2.14808100 |
| H | -1.48453400 | 0.13561300  | -2.99869500 |
| C | -1.17550100 | 0.03273300  | -0.82182300 |
| H | -2.18798800 | -0.08738500 | -0.45403800 |
| C | 1.58884100  | -1.86554100 | -1.17602200 |
| H | 2.52854900  | -1.70557400 | -1.69989700 |
| C | 0.47214800  | -2.45350000 | -1.83880300 |
| H | 0.30286000  | -2.46983300 | -2.90690800 |
| C | 1.60318200  | -2.44807600 | 0.24434500  |
| H | 2.28497300  | -3.31706200 | 0.26281000  |
| H | 1.94293900  | -1.75550900 | 1.01980900  |
| C | 0.17327000  | -2.91852900 | 0.39414900  |
| H | -0.26581100 | -3.23915400 | 1.33118400  |
| C | -0.39761300 | -3.02096400 | -0.85329500 |
| H | -1.38328600 | -3.42055400 | -1.06247400 |

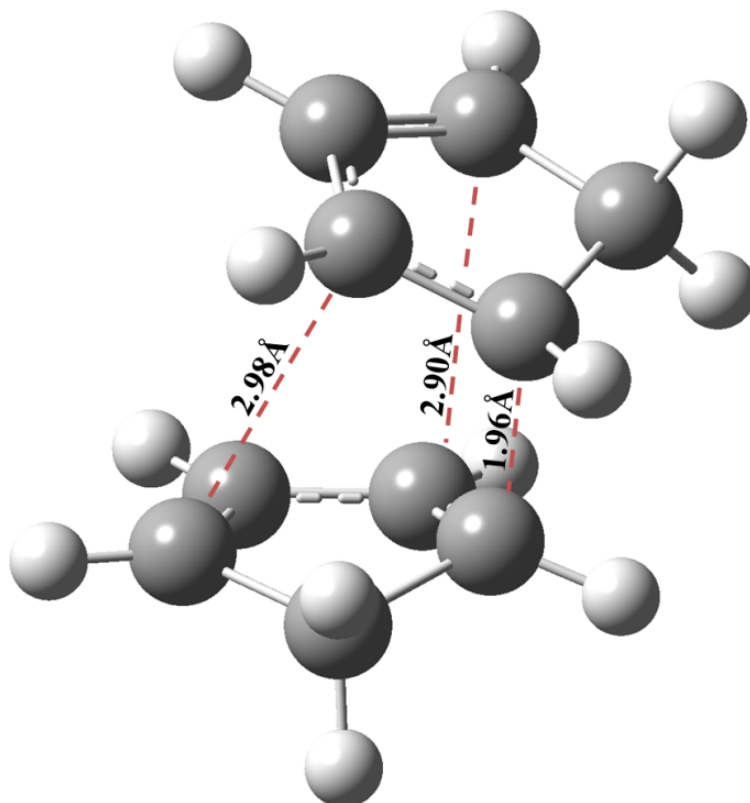

**Reaction (7): Isoprene dimerization – 1,3 TS (B3LYP/6-31++G)**

|   |             |             |             |
|---|-------------|-------------|-------------|
| C | 0.90747100  | 1.77450000  | -0.43225600 |
| H | 0.20642600  | 1.51522700  | -1.22640800 |
| H | 1.05666400  | 2.84905300  | -0.33596500 |
| C | 2.03138600  | 0.95294900  | -0.21922700 |
| H | 2.91826100  | 1.39884700  | 0.22994600  |
| C | 1.97105700  | -0.46227900 | -0.29495500 |
| C | 3.15297700  | -1.26837900 | 0.22145300  |
| H | 4.03209100  | -1.12392200 | -0.42032700 |
| H | 3.43921200  | -0.96635300 | 1.23713300  |
| H | 2.92809500  | -2.33960500 | 0.23735600  |
| C | 0.81608800  | -1.09752900 | -0.71363800 |
| H | 0.72985800  | -2.17948000 | -0.65785400 |
| H | 0.05284700  | -0.59186300 | -1.28802900 |
| C | -0.37626400 | 1.40624500  | 1.00848400  |
| H | -1.00675800 | 2.26283900  | 0.77288300  |
| H | 0.26168900  | 1.57879200  | 1.87056400  |
| C | -0.95713300 | 0.12397600  | 0.89168900  |
| H | -0.61606100 | -0.66201000 | 1.55812600  |
| C | -2.12024100 | -0.18886600 | 0.06288900  |
| C | -2.69257100 | -1.58577500 | 0.22698400  |
| H | -3.02699600 | -1.75093400 | 1.25999200  |
| H | -1.93619800 | -2.35057900 | 0.00752200  |
| H | -3.54717100 | -1.74959200 | -0.43623800 |
| C | -2.67471400 | 0.68116300  | -0.82223400 |
| H | -3.53121100 | 0.39893300  | -1.42650700 |
| H | -2.30908900 | 1.69461900  | -0.95733800 |

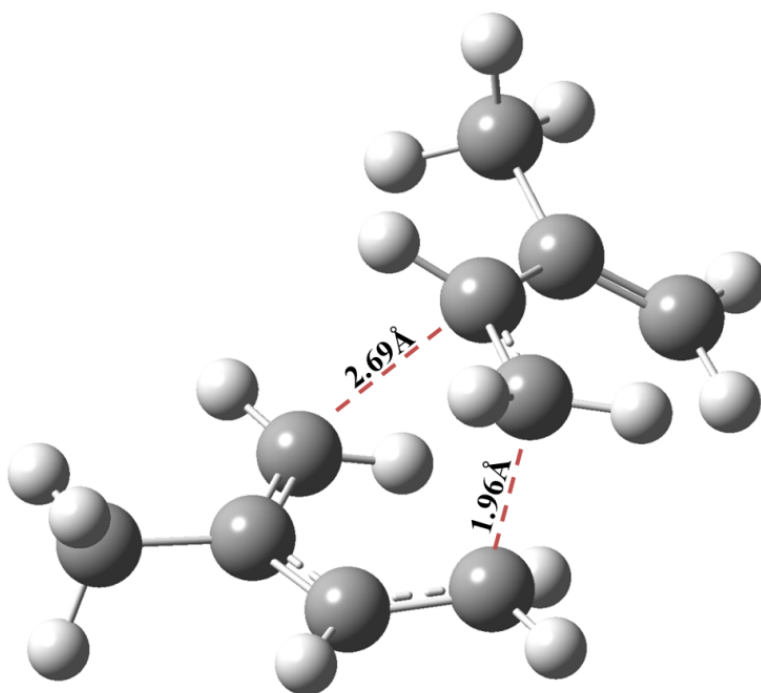

**Reaction (7): Isoprene dimerization – 1,4 TS (B3LYP/6-31++G)**

|   |             |             |             |
|---|-------------|-------------|-------------|
| C | -1.31397800 | -1.01945400 | -0.63824800 |
| H | -0.55180500 | -0.87542400 | -1.40254200 |
| H | -1.77437100 | -2.00636600 | -0.67532500 |
| C | -2.13995400 | 0.06596100  | -0.28165200 |
| C | -3.50542100 | -0.19740300 | 0.31810400  |
| H | -4.10658200 | -0.86099900 | -0.31495300 |
| H | -3.42312700 | -0.68241000 | 1.30445900  |
| H | -4.06562100 | 0.73311900  | 0.45874900  |
| C | -1.59297700 | 1.37565100  | -0.22342800 |
| H | -2.20597400 | 2.14871300  | 0.24041600  |
| C | -0.29925200 | 1.69253500  | -0.57237300 |
| H | 0.09106400  | 2.68951200  | -0.38825900 |
| H | 0.31337600  | 1.05178900  | -1.19219300 |
| C | 0.00111000  | -1.25347400 | 0.83302100  |
| H | 0.32387600  | -2.23112800 | 0.47739800  |
| H | -0.69165600 | -1.31375500 | 1.66873900  |
| C | 0.96622800  | -0.22679500 | 0.87257600  |
| H | 0.86761200  | 0.54903400  | 1.62546600  |
| C | 2.19398400  | -0.20874000 | 0.07946900  |
| C | 3.18409900  | 0.89063200  | 0.42184000  |
| H | 3.51559600  | 0.80603900  | 1.46547200  |
| H | 2.72617300  | 1.88236700  | 0.30948100  |
| H | 4.06928400  | 0.84819900  | -0.21984300 |
| C | 2.46279000  | -1.08816800 | -0.92198500 |
| H | 3.38535600  | -1.02850500 | -1.49090300 |
| H | 1.78702700  | -1.89464700 | -1.19010300 |

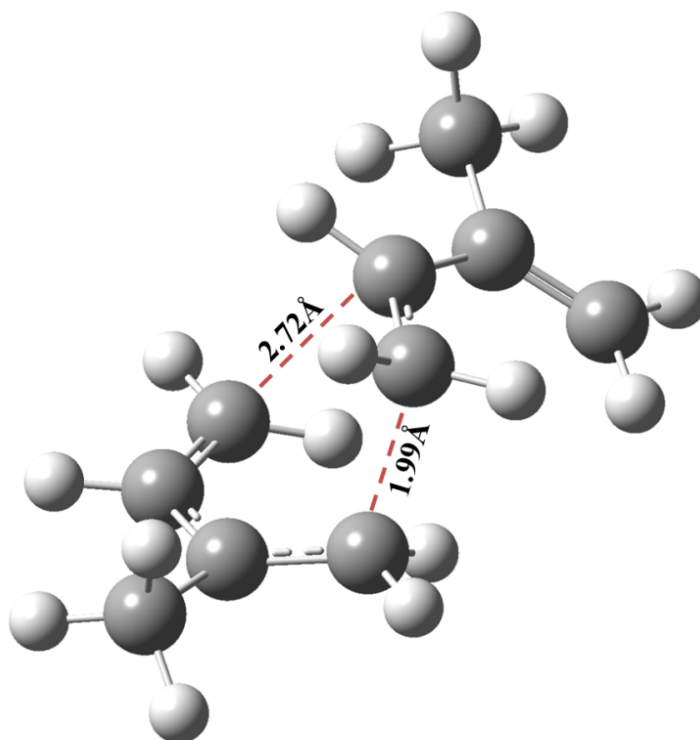

**Reaction (8): Methyl-methane hydrogen transfer (B3LYP/6-31++G\*\*)**

|   |             |             |             |
|---|-------------|-------------|-------------|
| C | -0.26079600 | 0.00000000  | 0.09220400  |
| H | -0.17925100 | 0.00000100  | 1.17875300  |
| H | 1.00880500  | -0.00000100 | -0.35666900 |
| H | -0.70505500 | -0.91069900 | -0.30841500 |
| H | -0.70505400 | 0.91069900  | -0.30841700 |
| C | 2.27840600  | -0.00000200 | -0.80554100 |
| H | 2.72266700  | -0.91069500 | -0.40491100 |
| H | 2.19686100  | -0.00001500 | -1.89209000 |
| H | 2.72266100  | 0.91070300  | -0.40493100 |

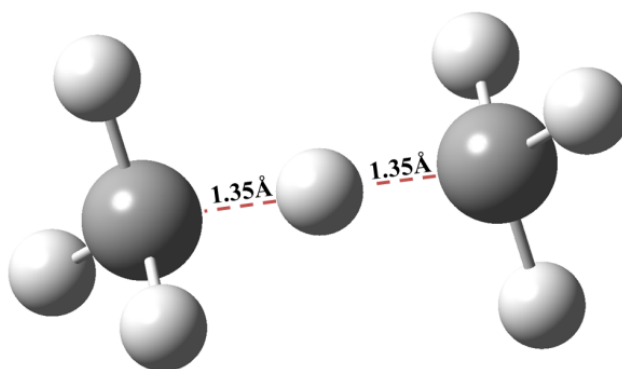

Supplement: c2cp22949h.pdf [file c2cp22949h.pdf]
